# Supplementary material for: Effects of Donor Ages and Propagation Methods on Seedling Growth of Platycladus orientalis (L.) Franco in Winter
Source: MDPI journal article supplement (doi:10.3390/ijms24087170), 2023-04-12
Supplement: s1 [file s1]

**Supplementary Table S1.** Betweenness Centrality value ranking of hub genes.

| Modules green  |        | Modules black    |       |
|----------------|--------|------------------|-------|
| GeneID         | Score  | GeneID           | Score |
| <i>CADG</i>    | 314.67 | <i>FAB1</i>      | 21.53 |
| <i>C4H</i>     | 184.33 | <i>CAC3</i>      | 20.67 |
| <i>OMT1</i>    | 67.33  | <i>ACPI</i>      | 19.90 |
| <i>CCR2</i>    | 44.0   | <i>AtPDAT2</i>   | 14.13 |
| <i>PAL</i>     | 25.67  | <i>FATA2</i>     | 13.33 |
| <i>BGLU21</i>  | 19.0   | <i>PKT4</i>      | 12.90 |
| <i>4CL1</i>    | 14.33  | <i>ACCD</i>      | 12.03 |
| <i>ALDH7B4</i> | 14.33  | <i>ACLA-3</i>    | 12.03 |
| <i>PRX52</i>   | 11.53  | <i>FAD3</i>      | 10.67 |
| <i>PA2</i>     | 8.0    | <i>AT3G55310</i> | 6.0   |

**Supplementary Table S2.** Hub genes detected in the green and black modules.

| Modules | Gene_id               | Gene annotation                                                                |
|---------|-----------------------|--------------------------------------------------------------------------------|
| green   | TRINITY_DN52222_c0_g3 | <i>CADG (Probable cinnamyl alcohol dehydrogenase)</i>                          |
|         | TRINITY_DN57476_c1_g2 | <i>C4H (Cinnamate 4-hydroxylase)</i>                                           |
|         | TRINITY_DN55807_c0_g1 | <i>OMT1 (Flavone 3'-O-methyltransferase 1)</i>                                 |
|         | TRINITY_DN50497_c0_g2 | <i>CCR2 (Dihydroflavonol-4-reductase)</i>                                      |
|         | TRINITY_DN2977_c0_g1  | <i>PAL (Phenylalanine ammonialyase)</i>                                        |
|         | TRINITY_DN54540_c4_g1 | <i>BGLU21 (Beta-glucosidase 21)</i>                                            |
|         | TRINITY_DN48909_c0_g1 | <i>4CL1 (4-coumarate--CoA ligase 1)</i>                                        |
|         | TRINITY_DN54466_c2_g5 | <i>ALDH7B4 (Aldehyde dehydrogenase)</i>                                        |
|         | TRINITY_DN55621_c3_g5 | <i>PRX52 (Peroxidase 52)</i>                                                   |
|         | TRINITY_DN39540_c0_g1 | <i>PA2 (Peroxidase 53)</i>                                                     |
| black   | TRINITY_DN44444_c0_g1 | <i>FAB1 (3-oxoacyl-[acyl-carrier-protein] synthase 2)</i>                      |
|         | TRINITY_DN49634_c1_g1 | <i>CAC3 (Acetyl-coenzyme A carboxylase carboxyl transferase subunit alpha)</i> |
|         | TRINITY_DN40677_c0_g1 | <i>ACPI(Acyl carrier protein 1)</i>                                            |
|         | TRINITY_DN140057_c0_g | <i>AtPDAT2 (Putative phospholipid:diacylglycerol acyltransferase 2)</i>        |
|         | TRINITY_DN4115_c0_g1  | <i>FATA2 (Oleoyle-acyl carrier protein thioesterase 2)</i>                     |
|         | TRINITY_DN63470_c0_g1 | <i>PKT4 (3-ketoacyl-CoA thiolase 1)</i>                                        |
|         | TRINITY_DN55731_c2_g3 | <i>ACCD (Acetyl-coenzyme A carboxylase carboxyl transferase subunit beta)</i>  |
|         | TRINITY_DN72476_c0_g1 | <i>ACLA-3 (Elongation of fatty acids protein 3)</i>                            |
|         | TRINITY_DN44771_c0_g1 | <i>FAD3 (Omega-3 fatty acid desaturase)</i>                                    |
|         | TRINITY_DN99232_c0_g1 | <i>AT3G55310 (Elongation of fatty acids protein A)</i>                         |

**Supplementary Table S3** Primers of the candidate genes designed for qRT-PCR

| Gene ID               | Gene abbreviation | Gene name                                      | Size (bp) | Forward primer<br>Reverse primer              |
|-----------------------|-------------------|------------------------------------------------|-----------|-----------------------------------------------|
| TRINITY_DN53682_c1_g1 | <i>AtPME52</i>    | <i>Pectin methylesterase 52</i>                | 104       | TGTTGCGACAAGTGCAAGAGG<br>CACCTTGTCTCCTCCCAAAA |
| TRINITY_DN57178_c2_g1 | <i>SDH</i>        | <i>Sorbitol dehydrogenase</i>                  | 92        | CTTGGAAGGTTTGTGGAGGA<br>CATGGTGGCAGTTTTGTCTG  |
| TRINITY_DN49634_c1_g1 | <i>ACCase</i>     | <i>Acetyl-CoA carboxylase 1</i>                | 107       | TCCCATAACAATCCCACCAAG<br>CGCCTAGCTCAATGGTTGAT |
| TRINITY_DN52424_c0_g1 | <i>ACT</i>        | <i>Agmatine coumaroyltransferase-2</i>         | 123       | TATCGAACCGGAGCAGAATC<br>TGCGAGCTAAGAAAGGGAAA  |
| TRINITY_DN44726_c0_g1 | <i>MGL</i>        | <i>Monoglyceride lipase</i>                    | 101       | GAGGTGCTTGGAGTCCTGAA<br>TTTCCACATCGAAGGAGACC  |
| TRINITY_DN48651_c1_g2 | <i>ESI3</i>       | <i>Salt stress-induced hydrophobic peptide</i> | 108       | GCGGTATGGGTTGTAGTGCT<br>GTCGTTGCCGAAGTACCAAT  |
| TRINITY_DN48518_c0_g1 | <i>ACX</i>        | <i>Acyl-CoA oxidase</i>                        | 148       | GCGCAAGTTTGGCTCTTTAC<br>AGCCCATGAATCATTGAGC   |
| TRINITY_DN55657_c4_g1 | <i>TPC1</i>       | <i>Two pore calcium channel protein 1</i>      | 147       | CCAAAGGGCCATTTTGTGT<br>CGTGGTTGAAGCCAAATTCT   |
